# Supplementary material
Source: Elsevier journal article supplement (https://www.sciencedirect.com/science/article/pii/S2529993X21002173)
Supplement: mmc1 [file S2529993X21002173:mmc1.xlsx]

## Sheet: Hoja1
					Cut off	Cut off	Cut off			Cut off	Cut off
		Pacientes Chagásicos en Fase Aguda			0.35	1/50	1/50			0.3	1.1
	CÓDIGO	Extedido GG	Cultivo	Xenodiagnóstico	ELISA	HAI	IFI	RESULTADO FINAL	Historia Clínica	ELISA Casero	ELISA Vircell	PCR Casero	PCR Vircell
1	LCH-001	Negativo	Negativo	Positivo	0.545	Positivo 1/100	Positivo 1/100	Positivo	Chagas agudo	0.408	1.8	Positivo	Positivo
2	LCH-002	Positivo	Negativo	Positivo	0.421	Positivo 1/50	Positivo 1/50	Positivo	Chagas agudo	0.481	1.9	Positivo	Positivo
3	LCH-003	Negativo	Negativo	Positivo	0.536	Positivo 1/100	Positivo 1/100	Positivo	Chagas agudo	0.327	1.3	Positivo	Positivo
4	LCH-004	Negativo	Negativo	Positivo	0.595	Positivo 1/100	Positivo 1/100	Positivo	Chagas agudo	0.354	1.4	Positivo	Positivo
5	LCH-005	Negativo	Positivo	Negativo	0.616	Positivo 1/100	Positivo 1/100	Positivo	Chagas agudo	0.458	2.1	Positivo	Positivo
6	LCH-006	Positivo	Positivo	Positivo	0.625	Positivo 1/100	Positivo 1/100	Positivo	Chagas agudo	0.789	1.6	Positivo	Positivo
7	LCH-007	Negativo	Positivo	Negativo	0.521	Positivo 1/100	Positivo 1/100	Positivo	Chagas agudo	0.392	1.6	Positivo	Positivo
8	LCH-008	Negativo	Negativo	Positivo	0.607	Positivo 1/100	Positivo 1/100	Positivo	Chagas agudo	0.371	1.3	Positivo	Positivo
9	LCH-009	Negativo	Positivo	Negativo	0.635	Positivo 1/100	Positivo 1/100	Positivo	Chagas agudo	0.409	1.9	Negativo	Negativo
10	LCH-010	Negativo	Negativo	Positivo	0.722	Positivo 1/100	Positivo 1/100	Positivo	Chagas agudo	0.444	1.6	Positivo	Positivo
11	LCH-011	Positivo	Negativo	Positivo	0.608	Positivo 1/100	Positivo 1/100	Positivo	Chagas agudo	0.424	1.9	Positivo	Positivo
12	LCH-012	Negativo	Positivo	Negativo	0.532	Positivo 1/100	Positivo 1/100	Positivo	Chagas agudo	0.789	2.1	Positivo	Positivo
13	LCH-013	Negativo	Negativo	Positivo	0.555	Positivo 1/100	Positivo 1/100	Positivo	Chagas agudo	0.592	2	Positivo	Positivo
14	LCH-014	Positivo	Positivo	Positivo	0.529	Positivo 1/100	Positivo 1/100	Positivo	Chagas agudo	0.371	1.8	Positivo	Positivo
15	LCH-015	Negativo	Negativo	Positivo	0.611	Positivo 1/100	Positivo 1/100	Positivo	Chagas agudo	0.409	1.7	Positivo	Positivo
16	LCH-016	Negativo	Positivo	Positivo	0.659	Positivo 1/100	Positivo 1/100	Positivo	Chagas agudo	0.542	1.6	Positivo	Positivo
17	LCH-017	Positivo	Negativo	Negativo	0.356	Positivo1/50	Positivo1/50	Positivo	Chagas agudo	0.479	1.2	Positivo	Positivo
18	LCH-018	Negativo	Negativo	Positivo	0.416	Positivo1/100	Positivo1/100	Positivo	Chagas agudo	0.361	1.2	Positivo	Positivo
19	LCH-019	Negativo	Positivo	Positivo	0.374	Positivo1/100	Positivo1/100	Positivo	Chagas agudo	0.232	1.3	Positivo	Positivo
20	LCH-020	Negativo	Negativo	Positivo	0.436	Positivo1/100	Positivo1/100	Positivo	Chagas agudo	0.721	2.4	Positivo	Positivo
21	LCH-021	Negativo	Positivo	Negativo	0.493	Positivo1/100	Positivo1/100	Positivo	Chagas agudo	0.438	1.5	Positivo	Positivo
22	LCH-022	Negativo	Negativo	Positivo	0.5	Positivo1/100	Positivo1/100	Positivo	Chagas agudo	0.501	1.3	Positivo	Negativo
23	LCH-023	Negativo	Negativo	Positivo	0.41	Positivo1/100	Positivo1/100	Positivo	Chagas agudo	0.933	3.1	Positivo	Positivo
24	LCH-024	Positivo	Positivo	Positivo	0.454	Positivo1/100	Positivo1/100	Positivo	Chagas agudo	0.659	2.4	Positivo	Positivo
25	LCH-025	Positivo	Negativo	Negativo	0.404	Positivo1/50	Positivo1/50	Positivo	Chagas agudo	0.457	2.3	Positivo	Positivo
26	LCH-026	Negativo	Positivo	Positivo	0.538	Positivo1/100	Positivo1/100	Positivo	Chagas agudo	0.367	1.3	Positivo	Positivo
27	LCH-027	Negativo	Negativo	Positivo	0.597	Positivo1/100	Positivo1/100	Positivo	Chagas agudo	0.345	1.7	Positivo	Positivo
28	LCH-028	Negativo	Negativo	Positivo	0.571	Positivo1/100	Positivo1/100	Positivo	Chagas agudo	0.589	2.1	Positivo	Positivo
29	LCH-029	Negativo	Negativo	Positivo	0.422	Positivo1/100	Positivo1/100	Positivo	Chagas agudo	0.422	1.4	Positivo	Positivo
30	LCH-030	Negativo	Positivo	Negativo	0.429	Positivo1/100	Positivo1/100	Positivo	Chagas agudo	0.505	1.7	Positivo	Positivo
31	LCH-031	Negativo	Positivo	Negativo	0.474	Positivo1/100	Positivo1/100	Positivo	Chagas agudo	0.405	1.3	Positivo	Positivo
32	LCH-032	Positivo	Negativo	Negativo	0.781	Positivo1/50	Positivo1/100	Positivo	Chagas agudo	0.739	1.2	Positivo	Positivo
33	LCH-033	Negativo	Negativo	Positivo	0.411	Positivo1/100	Positivo1/100	Positivo	Chagas agudo	0.199	0.9	Positivo	Positivo
34	LCH-034	Negativo	Negativo	Positivo	0.573	Positivo1/100	Positivo1/100	Positivo	Chagas agudo	0.325	1.3	Positivo	Positivo
35	LCH-035	Negativo	Negativo	Positivo	0.596	Positivo1/100	Positivo1/100	Positivo	Chagas agudo	0.427	1.3	Positivo	Positivo
		Pacientes Chagásicos en Fase Crónica
	CÓDIGO	Extedido GG	Cultivo	Xenodiagnóstico	ELISA	HAI	IFI	RESULTADO FINAL	Historia Clínica	ELISA Casero	ELISA Vircell	PCR Casero	PCR Vircell
1	CCV-001	Negativo	Negativo	Negativo	0.541	Positivo 1/100	Positivo 1/100	Positivo	Chagas crónico	0.569	2.1	Positivo	Positivo
2	CCV-002	Negativo	Negativo	Negativo	0.503	Positivo 1/50	Positivo 1/50	Positivo	Chagas crónico	0.371	1.6	Positivo	Positivo
3	CCV-003	Negativo	Negativo	Negativo	0.606	Positivo 1/50	Positivo 1/50	Positivo	Chagas crónico	0.386	1.9	Negativo	Positivo
4	CCV-004	Negativo	Negativo	Negativo	0.234	Positivo 1/50	Positivo 1/50	Positivo	Chagas crónico	0.682	1.3	Positivo	Positivo
5	CCV-005	Negativo	Negativo	Negativo	0.674	Positivo 1/50	Positivo 1/50	Positivo	Chagas crónico	0.392	1.9	Positivo	Positivo
6	CCV-006	Negativo	Negativo	Negativo	0.726	Positivo 1/100	Positivo 1/100	Positivo	Chagas crónico	0.394	1.6	Positivo	Positivo
7	CCV-007	Negativo	Negativo	Negativo	0.435	Negativo 1/25	Positivo 1/100	Positivo	Chagas crónico	0.287	1.9	Positivo	Positivo
8	CCV-008	Negativo	Negativo	Negativo	0.577	Positivo 1/100	Positivo 1/100	Positivo	Chagas crónico	0.474	1.7	Positivo	Positivo
9	CCV-009	Negativo	Negativo	Negativo	0.754	Positivo 1/50	Positivo 1/50	Positivo	Chagas crónico	0.363	1	Positivo	Positivo
10	CCV-010	Negativo	Negativo	Negativo	0.531	Positivo 1/100	Positivo 1/100	Positivo	Chagas crónico	0.338	1.2	Positivo	Positivo
11	CCV-011	Negativo	Negativo	Negativo	0.471	Positivo 1/50	Positivo 1/50	Positivo	Chagas crónico	0.377	1.4	Negativo	Negativo
12	CCV-012	Negativo	Negativo	Negativo	0.475	Positivo 1/50	Positivo 1/50	Positivo	Chagas crónico	0.438	1.3	Positivo	Positivo
13	CCV-013	Negativo	Negativo	Negativo	0.488	Positivo 1/100	Positivo 1/100	Positivo	Chagas crónico	0.584	1.7	Positivo	Positivo
14	CCV-014	Negativo	Negativo	Negativo	0.583	Positivo 1/50	Positivo 1/50	Positivo	Chagas crónico	0.403	1.3	Positivo	Positivo
15	CCV-015	Negativo	Negativo	Negativo	0.615	Positivo 1/100	Positivo 1/100	Positivo	Chagas crónico	0.383	3.1	Negativo	Negativo
16	CCV-016	Negativo	Negativo	Negativo	0.636	Positivo 1/50	Positivo 1/50	Positivo	Chagas crónico	0.321	1.3	Positivo	Positivo
17	CCV-017	Negativo	Negativo	Negativo	0.647	Positivo 1/50	Positivo 1/50	Positivo	Chagas crónico	0.451	1.4	Positivo	Positivo
18	CCV-018	Negativo	Negativo	Negativo	0.431	Positivo 1/50	Positivo 1/50	Positivo	Chagas crónico	0.255	0.9	Positivo	Positivo
19	CCV-019	Negativo	Negativo	Negativo	0.653	Positivo 1/100	Positivo 1/100	Positivo	Chagas crónico	0.437	1.6	Positivo	Positivo
20	CCV-020	Negativo	Negativo	Negativo	0.665	Positivo 1/50	Positivo 1/50	Positivo	Chagas crónico	0.457	1.6	Positivo	Positivo
21	CCV-021	Negativo	Negativo	Negativo	0.741	Positivo 1/100	Positivo 1/50	Positivo	Chagas crónico	0.676	3.1	Positivo	Positivo
22	CCV-022	Negativo	Negativo	Negativo	0.504	Positivo 1/50	Positivo 1/50	Positivo	Chagas crónico	0.513	2.2	Positivo	Positivo
23	CCV-023	Negativo	Negativo	Negativo	0.504	Positivo 1/50	Positivo 1/50	Positivo	Chagas crónico	0.592	2.5	Positivo	Positivo
24	CCV-024	Negativo	Negativo	Negativo	0.523	Positivo 1/50	Positivo 1/50	Positivo	Chagas crónico	0.325	0.8	Positivo	Positivo
25	CCV-025	Negativo	Negativo	Negativo	0.504	Positivo 1/50	Positivo 1/50	Positivo	Chagas crónico	0.443	1.3	Positivo	Positivo
26	CCV-026	Negativo	Negativo	Negativo	0.513	Positivo 1/50	Positivo 1/50	Positivo	Chagas crónico	0.522	1.7	Negativo	Negativo
27	CCV-027	Negativo	Negativo	Negativo	0.589	Positivo 1/50	Positivo 1/50	Positivo	Chagas crónico	0.941	2.1	Negativo	Positivo
28	CCV-028	Negativo	Negativo	Negativo	0.581	Positivo 1/50	Positivo 1/50	Positivo	Chagas crónico	0.361	1.4	Positivo	Positivo
29	CCV-029	Negativo	Negativo	Negativo	0.641	Positivo 1/50	Positivo 1/50	Positivo	Chagas crónico	0.442	1.7	Positivo	Positivo
30	CCV-030	Negativo	Negativo	Negativo	0.593	Positivo 1/50	Positivo 1/100	Positivo	Chagas crónico	0.491	1.9	Positivo	Positivo
31	CCV-031	Negativo	Negativo	Negativo	0.501	Positivo 1/100	Positivo 1/100	Positivo	Chagas crónico	0.396	1.2	Positivo	Positivo
32	CCV-032	Negativo	Negativo	Negativo	0.565	Positivo 1/100	Positivo 1/100	Positivo	Chagas crónico	0.519	1.7	Positivo	Positivo
33	CCV-033	Negativo	Negativo	Negativo	0.561	Positivo 1/100	Positivo 1/100	Positivo	Chagas crónico	0.322	1.3	Positivo	Positivo
		Pacientes heterólogos
	CÓDIGO	Extedido GG	Cultivo	Xenodiagnóstico	ELISA	HAI	IFI	RESULTADO FINAL	Historia Clínica	ELISA Casero	ELISA Vircell	PCR Casero	PCR Vircell
1	BLV001	Negativo	Negativo	Negativo	0.105	Negativo	Negativo	Negativo	Leishmaniasis visceral	0.059	0.4	Negativo	Negativo
2	BLV002	Negativo	Negativo	Negativo	0.034	Negativo	Negativo	Negativo	Leishmaniasis visceral	0.079	0.1	Negativo	Negativo
3	BLV003	Negativo	Negativo	Negativo	0.121	Negativo	Negativo	Negativo	Leishmaniasis visceral	0.315	1.3	Negativo	Negativo
4	BLV004	Negativo	Negativo	Negativo	0.109	Negativo	Negativo	Negativo	Leishmaniasis visceral	0.072	0.6	Negativo	Negativo
5	BLV005	Negativo	Negativo	Negativo	0.152	Negativo	Negativo	Negativo	Leishmaniasis visceral	0.087	0.8	Negativo	Negativo
6	BLV006	Negativo	Negativo	Negativo	0.125	Negativo	Negativo	Negativo	Leishmaniasis visceral	0.064	0.2	Negativo	Negativo
7	BLV007	Negativo	Negativo	Negativo	0.184	Negativo	Negativo	Negativo	Leishmaniasis visceral	0.038	0.5	Negativo	Negativo
8	BLV008	Negativo	Negativo	Negativo	0.188	Negativo	Negativo	Negativo	Leishmaniasis visceral	0.076	0.3	Negativo	Negativo
9	BLV009	Negativo	Negativo	Negativo	0.215	Negativo	Negativo	Negativo	Leishmaniasis visceral	0.322	1.2	Negativo	Negativo
10	BLV010	Negativo	Negativo	Negativo	0.091	Negativo	Negativo	Negativo	Leishmaniasis visceral	0.211	0.1	Negativo	Negativo
11	BLV011	Negativo	Negativo	Negativo	0.141	Negativo	Negativo	Negativo	Leishmaniasis visceral	0.188	0.2	Negativo	Negativo
12	BLC001	Negativo	Negativo	Negativo	0.152	Negativo	Negativo	Negativo	Leishmaniasis cutanea	0.146	0.5	Negativo	Negativo
13	BLC002	Negativo	Negativo	Negativo	0.141	Negativo	Negativo	Negativo	Leishmaniasis cutanea	0.111	0.3	Negativo	Negativo
14	BLC003	Negativo	Negativo	Negativo	0.247	Negativo	Negativo	Negativo	Leishmaniasis cutanea	0.084	0.9	Negativo	Negativo
15	BLC004	Negativo	Negativo	Negativo	0.119	Negativo	Negativo	Negativo	Leishmaniasis cutanea	0.101	0.7	Negativo	Negativo
16	BLC005	Negativo	Negativo	Negativo	0.155	Negativo	Negativo	Negativo	Leishmaniasis cutanea	0.187	0.3	Negativo	Negativo
17	BLC006	Negativo	Negativo	Negativo	0.166	Negativo	Negativo	Negativo	Leishmaniasis cutanea	0.267	0.6	Negativo	Negativo
18	BLC007	Negativo	Negativo	Negativo	0.118	Negativo	Negativo	Negativo	Leishmaniasis cutanea	0.181	0.6	Negativo	Negativo
19	BLC008	Negativo	Negativo	Negativo	0.111	Negativo	Negativo	Negativo	Leishmaniasis cutanea	0.168	0.9	Negativo	Negativo
20	BLC009	Negativo	Negativo	Negativo	0.171	Negativo	Negativo	Negativo	Leishmaniasis cutanea	0.102	0.9	Negativo	Negativo
21	BLC010	Negativo	Negativo	Negativo	0.129	Negativo	Negativo	Negativo	Leishmaniasis cutanea	0.067	0.7	Negativo	Negativo
22	BM001	Negativo	Negativo	Negativo	0.127	Negativo	Negativo	Negativo	Malaria	0.273	0.3	Negativo	Negativo
23	BM002	Negativo	Negativo	Negativo	0.172	Negativo	Negativo	Negativo	Malaria	0.114	0.2	Negativo	Negativo
24	BM003	Negativo	Negativo	Negativo	0.104	Negativo	Negativo	Negativo	Malaria	0.204	0.5	Negativo	Negativo
25	BM004	Negativo	Negativo	Negativo	0.129	Negativo	Negativo	Negativo	Malaria	0.218	0.2	Negativo	Negativo
26	BM005	Negativo	Negativo	Negativo	0.17	Negativo	Negativo	Negativo	Malaria	0.246	0.4	Negativo	Negativo
27	BT001	Negativo	Negativo	Negativo	0.121	Negativo	Negativo	Negativo	Toxoplasmosis	0.266	0.2	Negativo	Negativo
28	BT002	Negativo	Negativo	Negativo	0.172	Negativo	Negativo	Negativo	Toxoplasmosis	0.191	0.2	Negativo	Negativo
29	BT003	Negativo	Negativo	Negativo	0.066	Negativo	Negativo	Negativo	Toxoplasmosis	0.221	0.7	Negativo	Negativo
30	BT004	Negativo	Negativo	Negativo	0.122	Negativo	Negativo	Negativo	Toxoplasmosis	0.219	0.5	Negativo	Negativo
31	BT005	Negativo	Negativo	Negativo	0.101	Negativo	Negativo	Negativo	Toxoplasmosis	0.258	0.2	Negativo	Negativo
		Individuos sanos
	CÓDIGO	Extedido GG	Cultivo	Xenodiagnóstico	ELISA	HAI	IFI	RESULTADO FINAL	Historia Clínica	ELISA Casero	ELISA Vircell	PCR Casero	PCR Vircell
1	BIS001	Negativo	Negativo	Negativo	0.125	Negativo	Negativo	Negativo	Individuo sano	0.195	0.6	Negativo	Negativo
2	BIS002	Negativo	Negativo	Negativo	0.156	Negativo	Negativo	Negativo	Individuo sano	0.332	1.4	Negativo	Negativo
3	BIS003	Negativo	Negativo	Negativo	0.129	Negativo	Negativo	Negativo	Individuo sano	0.155	0.8	Negativo	Negativo
4	BIS004	Negativo	Negativo	Negativo	0.142	Negativo	Negativo	Negativo	Individuo sano	0.091	0.2	Negativo	Negativo
5	BIS005	Negativo	Negativo	Negativo	0.131	Negativo	Negativo	Negativo	Individuo sano	0.122	0.5	Negativo	Negativo
6	BIS006	Negativo	Negativo	Negativo	0.135	Negativo	Negativo	Negativo	Individuo sano	0.164	0.3	Negativo	Negativo
7	BIS007	Negativo	Negativo	Negativo	0.146	Negativo	Negativo	Negativo	Individuo sano	0.167	0.5	Negativo	Negativo
8	BIS008	Negativo	Negativo	Negativo	0.118	Negativo	Negativo	Negativo	Individuo sano	0.132	0.2	Negativo	Negativo
9	BIS009	Negativo	Negativo	Negativo	0.098	Negativo	Negativo	Negativo	Individuo sano	0.166	0.4	Negativo	Negativo
10	BIS010	Negativo	Negativo	Negativo	0.112	Negativo	Negativo	Negativo	Individuo sano	0.193	0.6	Negativo	Negativo
11	BIS011	Negativo	Negativo	Negativo	0.143	Negativo	Negativo	Negativo	Individuo sano	0.127	0.8	Negativo	Negativo
12	BIS012	Negativo	Negativo	Negativo	0.131	Negativo	Negativo	Negativo	Individuo sano	0.141	0.2	Negativo	Negativo
13	BIS013	Negativo	Negativo	Negativo	0.127	Negativo	Negativo	Negativo	Individuo sano	0.071	0.5	Negativo	Negativo
14	BIS014	Negativo	Negativo	Negativo	0.143	Negativo	Negativo	Negativo	Individuo sano	0.123	0.3	Negativo	Negativo
15	BIS015	Negativo	Negativo	Negativo	0.126	Negativo	Negativo	Negativo	Individuo sano	0.073	0.8	Negativo	Negativo
16	BIS016	Negativo	Negativo	Negativo	0.134	Negativo	Negativo	Negativo	Individuo sano	0.157	0.1	Negativo	Negativo
17	BIS017	Negativo	Negativo	Negativo	0.099	Negativo	Negativo	Negativo	Individuo sano	0.145	0.4	Negativo	Negativo
18	BIS018	Negativo	Negativo	Negativo	0.139	Negativo	Negativo	Negativo	Individuo sano	0.086	0.1	Negativo	Negativo
19	BIS019	Negativo	Negativo	Negativo	0.135	Negativo	Negativo	Negativo	Individuo sano	0.132	0.6	Negativo	Negativo
20	BIS020	Negativo	Negativo	Negativo	0.105	Negativo	Negativo	Negativo	Individuo sano	0.071	0.6	Negativo	Negativo
21	BIS021	Negativo	Negativo	Negativo	0.115	Negativo	Negativo	Negativo	Individuo sano	0.075	0.8	Negativo	Negativo
22	BIS022	Negativo	Negativo	Negativo	0.091	Negativo	Negativo	Negativo	Individuo sano	0.162	0.2	Negativo	Negativo
23	BIS023	Negativo	Negativo	Negativo	0.103	Negativo	Negativo	Negativo	Individuo sano	0.145	0.3	Negativo	Negativo
24	BIS024	Negativo	Negativo	Negativo	0.133	Negativo	Negativo	Negativo	Individuo sano	0.079	0.3	Negativo	Negativo
25	BIS025	Negativo	Negativo	Negativo	0.126	Negativo	Negativo	Negativo	Individuo sano	0.084	0.2	Negativo	Negativo
26	BIS026	Negativo	Negativo	Negativo	0.115	Negativo	Negativo	Negativo	Individuo sano	0.158	0.4	Negativo	Negativo
27	BIS027	Negativo	Negativo	Negativo	0.142	Negativo	Negativo	Negativo	Individuo sano	0.181	0.6	Negativo	Negativo
28	BIS028	Negativo	Negativo	Negativo	0.137	Negativo	Negativo	Negativo	Individuo sano	0.241	1.3	Negativo	Negativo
29	BIS029	Negativo	Negativo	Negativo	0.098	Negativo	Negativo	Negativo	Individuo sano	0.211	0.3	Negativo	Negativo
30	BIS030	Negativo	Negativo	Negativo	0.112	Negativo	Negativo	Negativo	Individuo sano	0.121	0.2	Negativo	Negativo
